# Supplementary material for: RASA2 ablation in T cells boosts antigen sensitivity and long-term function
Source: PubMed Central journal article supplement (PMC9433322; doi:10.1038/s41586-022-05126-w), 2022-08-24

---

**Supplementary information**

---

***RASA2* ablation in T cells boosts antigen sensitivity and long-term function**

---

In the format provided by the authors and unedited

# Supplementary Fig. 1: Uncropped gel source data

## Main Fig 2b

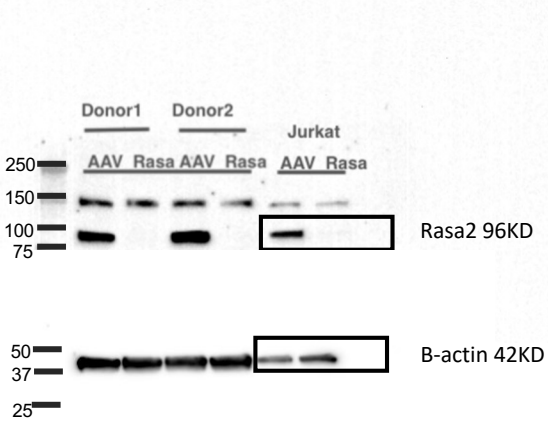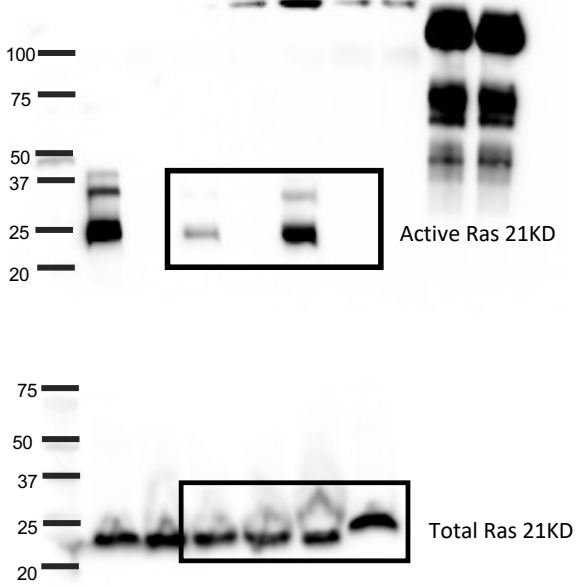

## Extended Fig 2

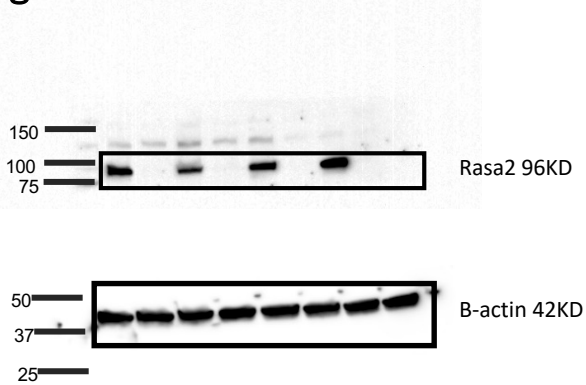

# Extended Fig 3a

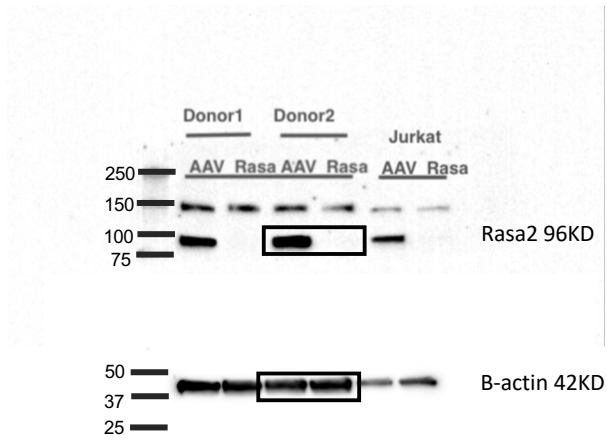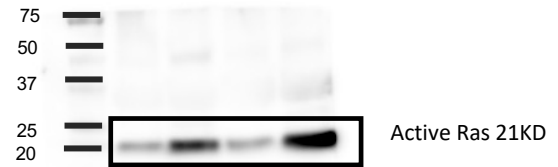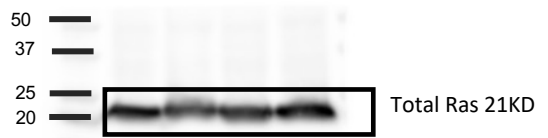

# Extended Fig 3C

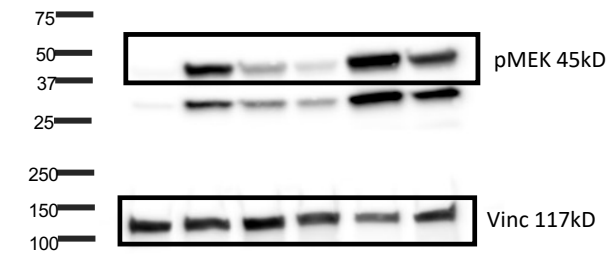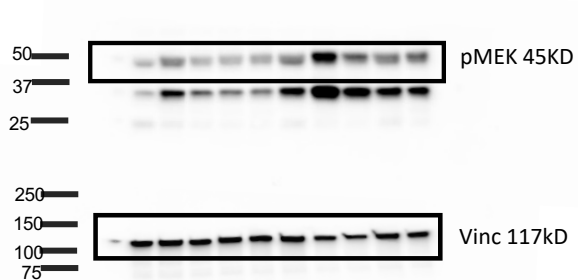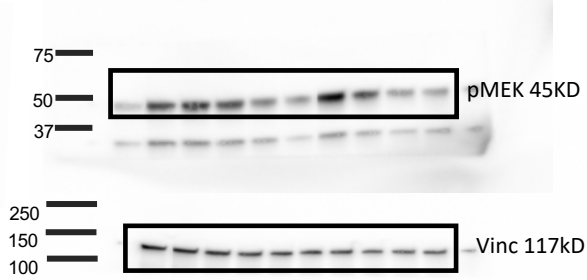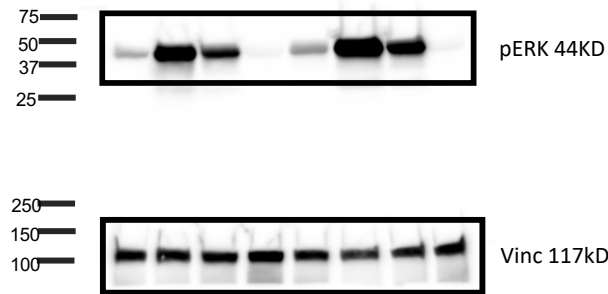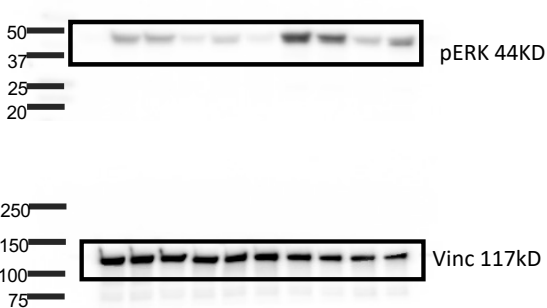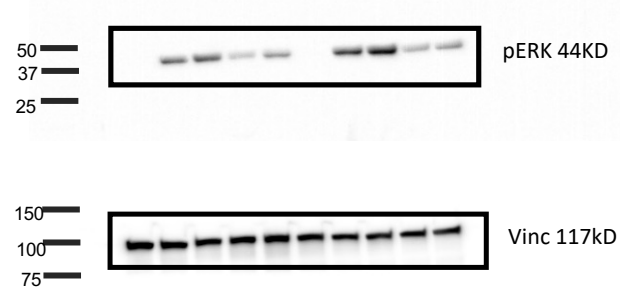

Extended Figure 5k

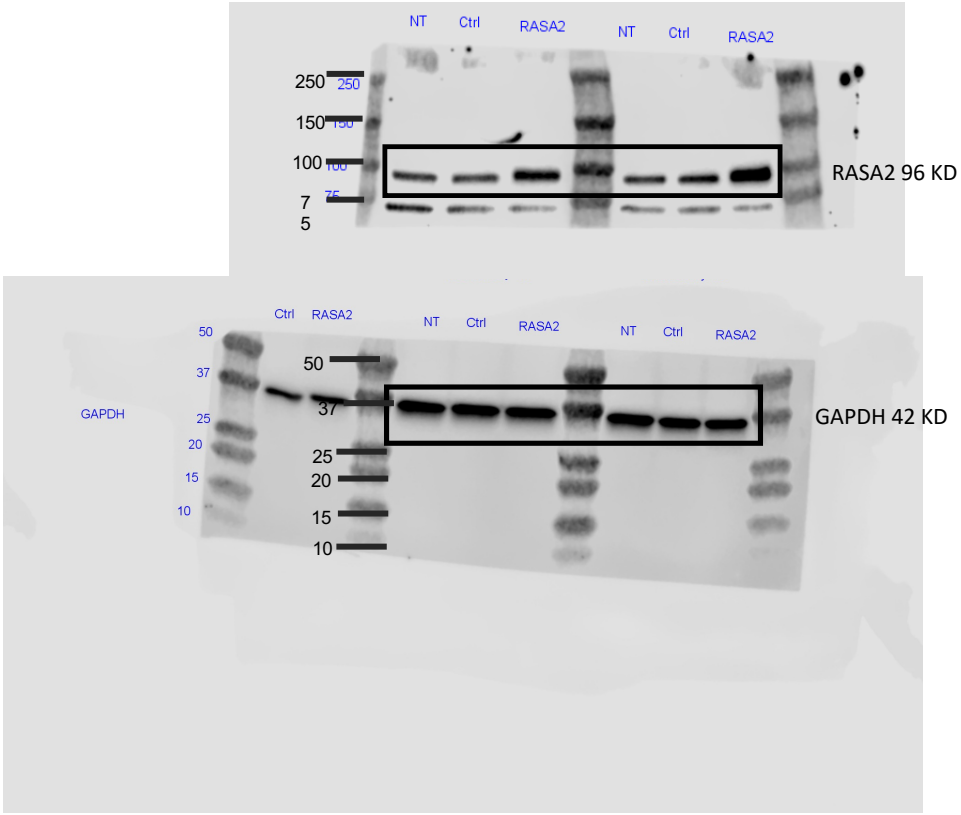

Extended Figure 6f

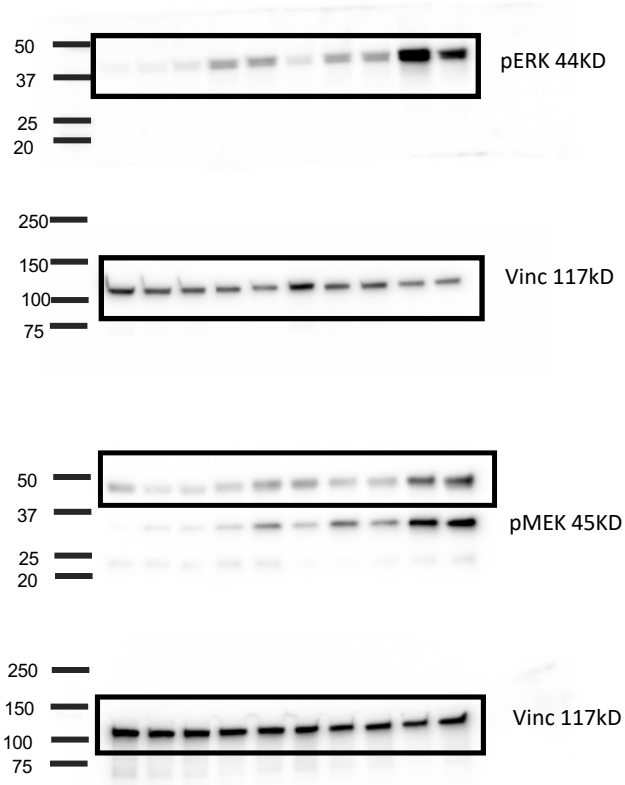

# Extended Figure 10i

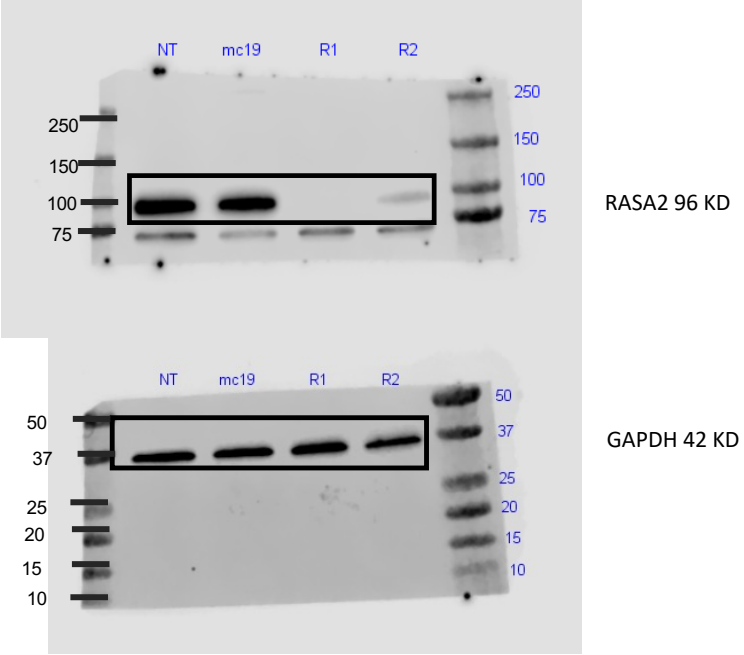

Supplement: 41586_2022_5126_MOESM1_ESM.pdf [file 41586_2022_5126_MOESM1_ESM.pdf]
