# Supplementary material for: RASA2 ablation in T cells boosts antigen sensitivity and long-term function
Source: PubMed Central journal article supplement (PMC9433322; doi:10.1038/s41586-022-05126-w), 2022-08-24
Supplement: 41586_2022_5126_MOESM3_ESM.pdf [file 41586_2022_5126_MOESM3_ESM.pdf]

## Statistics and Reproducibility - exact p-values and gating strategies

### 1.1. Fig\_1f

| E:T | Type         | group1 | group2 | n1 | n2 | statistic | df | p        |
|-----|--------------|--------|--------|----|----|-----------|----|----------|
| 1:1 | Adenosine    | CTRL   | RASA2  | 6  | 6  | 5.461613  | 5  | 0.002800 |
| 1:1 | Cyclosporine | CTRL   | RASA2  | 6  | 6  | 2.689243  | 5  | 0.043300 |
| 1:1 | Tacrolimus   | CTRL   | RASA2  | 6  | 6  | 5.231174  | 5  | 0.003380 |
| 1:1 | TGFb         | CTRL   | RASA2  | 6  | 6  | 4.254346  | 5  | 0.008060 |
| 1:2 | Adenosine    | CTRL   | RASA2  | 6  | 6  | 4.599105  | 5  | 0.005850 |
| 1:2 | Cyclosporine | CTRL   | RASA2  | 6  | 6  | 3.280158  | 5  | 0.022000 |
| 1:2 | Tacrolimus   | CTRL   | RASA2  | 6  | 6  | 9.126027  | 5  | 0.000265 |
| 1:2 | TGFb         | CTRL   | RASA2  | 6  | 6  | 3.633890  | 5  | 0.015000 |
| 1:4 | Adenosine    | CTRL   | RASA2  | 6  | 6  | 3.336535  | 5  | 0.020600 |
| 1:4 | Cyclosporine | CTRL   | RASA2  | 6  | 6  | 4.161547  | 5  | 0.008810 |
| 1:4 | Tacrolimus   | CTRL   | RASA2  | 6  | 6  | 6.248733  | 5  | 0.001540 |
| 1:4 | TGFb         | CTRL   | RASA2  | 6  | 6  | 3.718420  | 5  | 0.013700 |

### 1.2. Fig\_1g

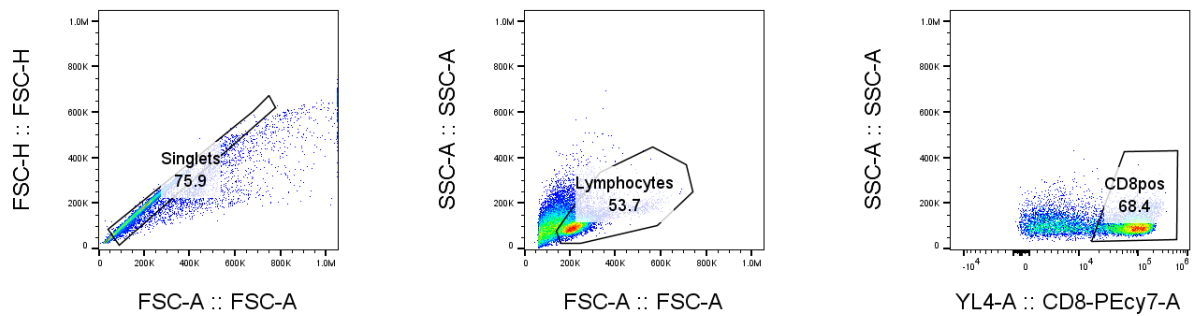

| TregRatio | group1  | group2 | n1 | n2 | statistic  | df | p       |
|-----------|---------|--------|----|----|------------|----|---------|
| 1to16     | NT.CTRL | RASA2  | 4  | 4  | -6.345588  | 3  | 0.00792 |
| 1to2      | NT.CTRL | RASA2  | 4  | 4  | -6.675490  | 3  | 0.00685 |
| 1to8      | NT.CTRL | RASA2  | 4  | 4  | -15.531412 | 3  | 0.00058 |

### 1.3. Fig\_2d

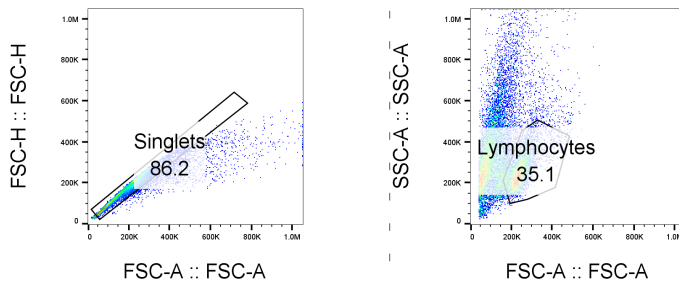

| marker | group1 | group2 | n1 | n2 | statistic | p       |
|--------|--------|--------|----|----|-----------|---------|
| pAKT   | CTRL   | RASA2  | 6  | 6  | 7         | 0.17700 |
| pERK   | CTRL   | RASA2  | 6  | 6  | 0         | 0.00216 |
| pMEK   | CTRL   | RASA2  | 6  | 6  | 0         | 0.00492 |
| pS6    | CTRL   | RASA2  | 6  | 6  | 0         | 0.00216 |

### 1.4. Fig\_2e

Gating strategy same as Fig 1g, positive gates shown in ED4a:

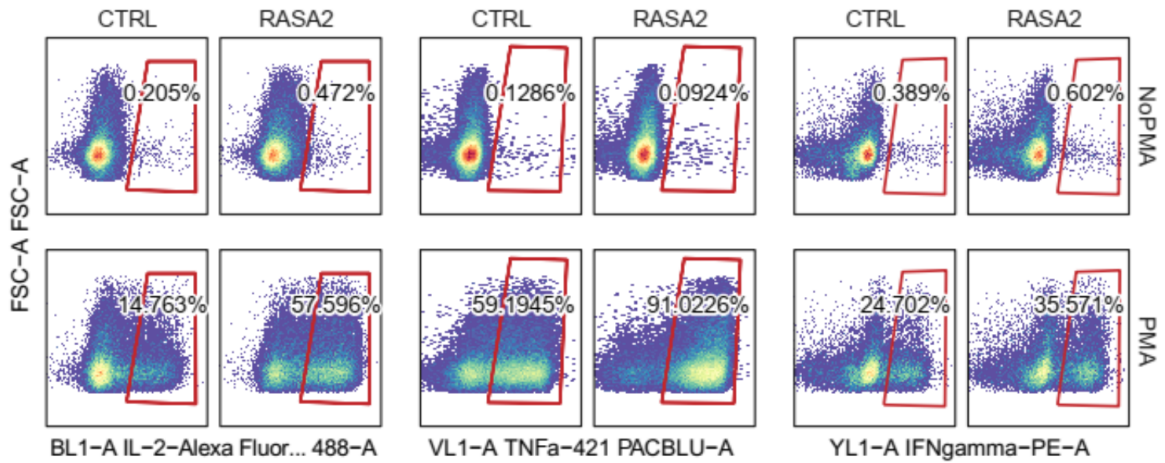

| pop  | group1 | group2 | n1 | n2 | statistic | p       |
|------|--------|--------|----|----|-----------|---------|
| IFNg | CTRL   | RASA2  | 6  | 6  | 5         | 0.04110 |
| IL2  | CTRL   | RASA2  | 6  | 6  | 0         | 0.00216 |
| TNFa | CTRL   | RASA2  | 6  | 6  | 0         | 0.00216 |

### 1.5. Fig\_2i

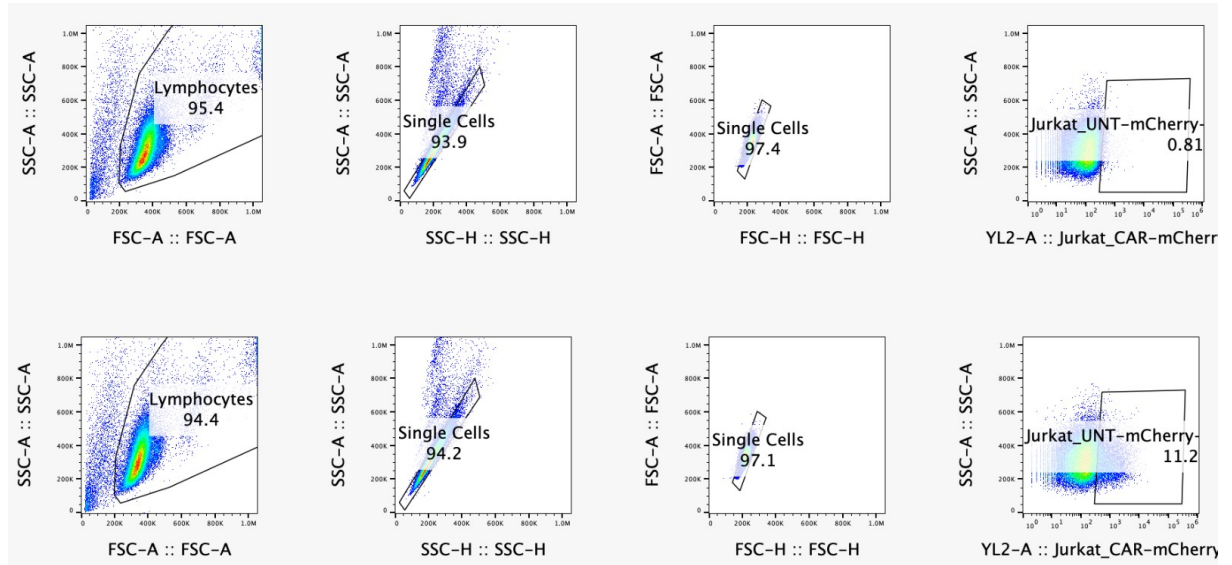

### 1.6. Fig\_3b

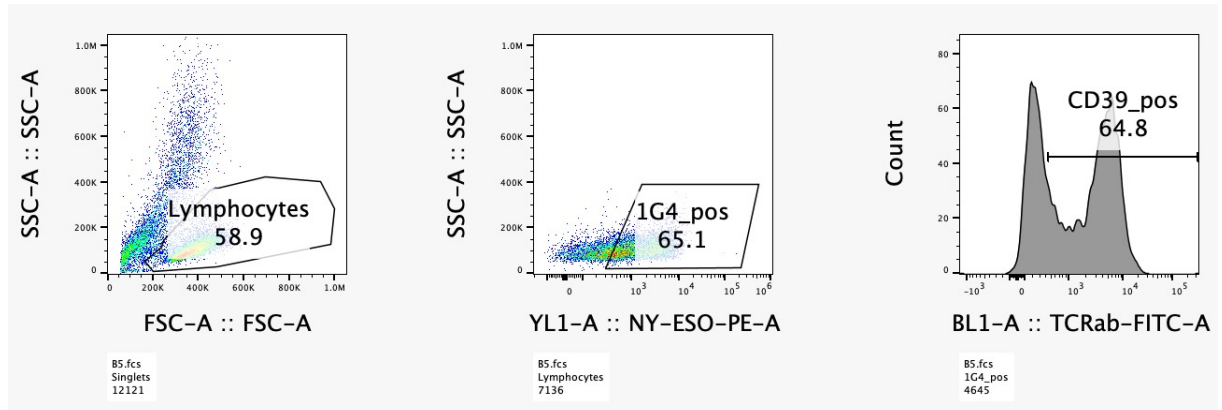

### 1.7. Fig\_3c

| Gene | group1 | group2 | n1 | n2 | statistic | p       |
|------|--------|--------|----|----|-----------|---------|
| GZMB | Stim1  | Stim5  | 6  | 6  | 33        | 0.01520 |
| IFNG | Stim1  | Stim5  | 6  | 6  | 33        | 0.01520 |
| TOX  | Stim1  | Stim5  | 6  | 6  | 0         | 0.00216 |

### 1.8. Fig\_3f

Gating strategy same as Fig 1g, positive gates shown in ED6g:

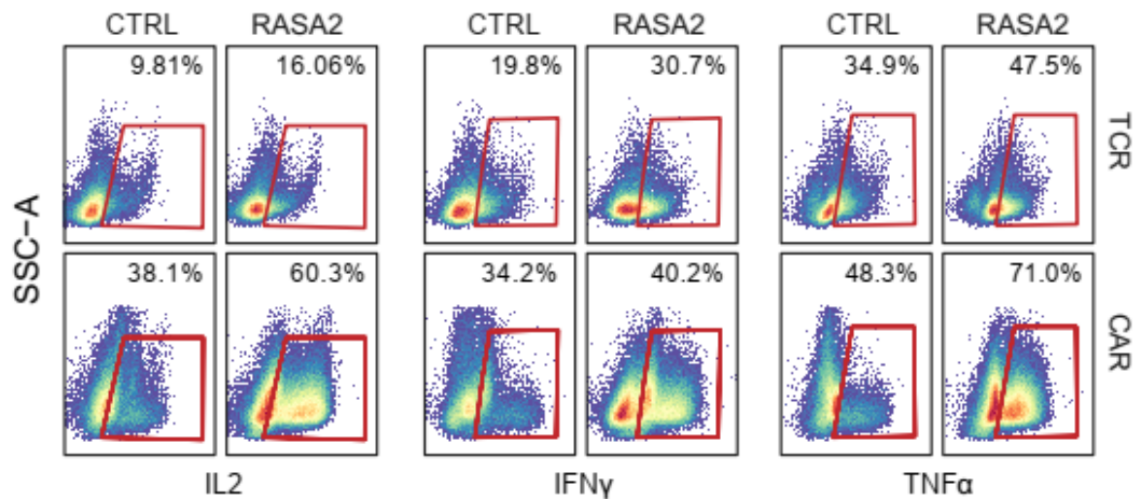

| pop          | group1 | group2 | n1 | n2 | statistic | df       | p        |
|--------------|--------|--------|----|----|-----------|----------|----------|
| IL2          | CTRL   | RASA2  | 6  | 6  | -7.640245 | 8.862429 | 3.48e-05 |
| IFNG         | CTRL   | RASA2  | 6  | 6  | -3.784238 | 9.185392 | 4.16e-03 |
| TNF $\alpha$ | CTRL   | RASA2  | 6  | 6  | -2.404329 | 9.286649 | 3.88e-02 |

### 1.9. Fig\_3g

| Cytokine      | group1 | group2 | n1 | n2 | statistic | p       |
|---------------|--------|--------|----|----|-----------|---------|
| GzmB          | CTRL   | RASA   | 6  | 6  | 0         | 0.00216 |
| GzmA          | CTRL   | RASA   | 6  | 6  | 5         | 0.04110 |
| Granulysin    | CTRL   | RASA   | 6  | 6  | 11        | 0.31000 |
| Perforin      | CTRL   | RASA   | 6  | 6  | 11        | 0.31000 |
| IL-10         | CTRL   | RASA   | 6  | 6  | 0         | 0.00216 |
| IFN- $\gamma$ | CTRL   | RASA   | 6  | 6  | 2         | 0.00866 |

### 1.10. Fig\_3i

| name        | group1 | group2 | n1 | n2 | statistic | p        |
|-------------|--------|--------|----|----|-----------|----------|
| BasalResp   | CTRL   | RASA2  | 11 | 12 | 27        | 1.56e-02 |
| MaximalResp | CTRL   | RASA2  | 11 | 12 | 19        | 2.80e-03 |
| SpareResp   | CTRL   | RASA2  | 11 | 12 | 7         | 6.66e-05 |

### 1.11. Fig\_4i

Gating strategy;

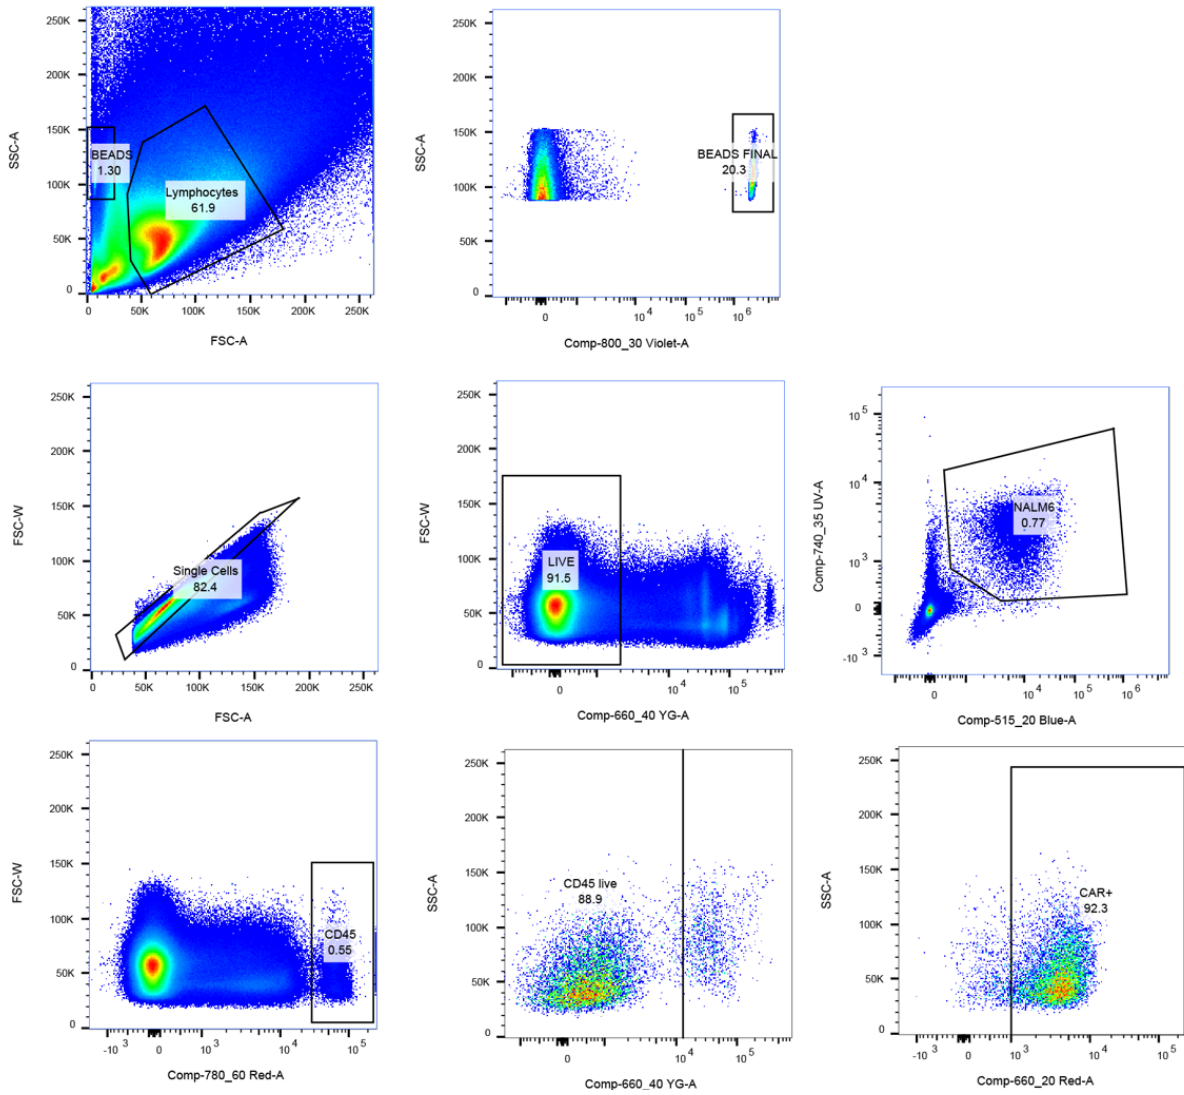

| Population | Day    | group1 | group2 | n1 | n2 | statistic | p       |
|------------|--------|--------|--------|----|----|-----------|---------|
| CAR        | Day 16 | AAVS1  | RASA2  | 5  | 6  | 0         | 0.00433 |
| CD45       | Day 16 | AAVS1  | RASA2  | 5  | 6  | 0         | 0.00433 |
| NALM6      | Day 16 | AAVS1  | RASA2  | 5  | 6  | 29        | 0.00866 |
| CAR        | Day 7  | AAVS1  | RASA2  | 5  | 6  | 6         | 0.12600 |
| CD45       | Day 7  | AAVS1  | RASA2  | 5  | 6  | 6         | 0.12600 |
| NALM6      | Day 7  | AAVS1  | RASA2  | 5  | 6  | 4         | 0.05190 |

### 1.12. Fig\_4j

Gating strategy same as Fig 4i

| Day | Marker | group1 | group2 | n1 | n2 | statistic | p       |
|-----|--------|--------|--------|----|----|-----------|---------|
| D14 | LAG3   | CTRL   | RASA2  | 5  | 6  | 28        | 0.01730 |
| D7  | LAG3   | CTRL   | RASA2  | 4  | 6  | 4         | 0.11400 |
| D14 | PD1    | CTRL   | RASA2  | 5  | 6  | 27        | 0.03030 |
| D7  | PD1    | CTRL   | RASA2  | 4  | 6  | 0         | 0.00952 |
| D14 | TIM3   | CTRL   | RASA2  | 5  | 6  | 27        | 0.03030 |
| D7  | TIM3   | CTRL   | RASA2  | 4  | 6  | 3         | 0.06670 |

### 1.13. Fig\_4k

Gating same as Fig. 4i and:

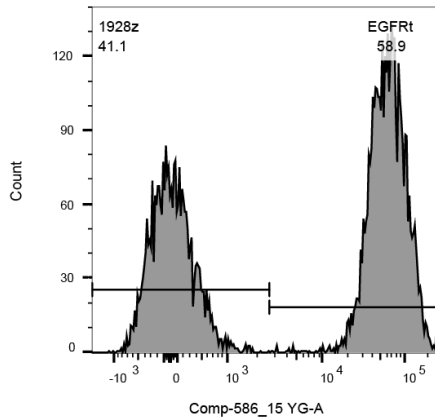

| Day    | group1 | group2 | n1 | n2 | statistic | p        |
|--------|--------|--------|----|----|-----------|----------|
| Day 16 | CTRL   | RASA2  | 12 | 12 | 0         | 7.40e-07 |
| Day 7  | CTRL   | RASA2  | 12 | 12 | 67        | 7.99e-01 |

### 1.14. Fig\_ED2h

| Tregs    | group1 | group2 | n1 | n2 | statistic | p        |
|----------|--------|--------|----|----|-----------|----------|
| 1:1      | CTRL   | RASA2  | 8  | 8  | 2         | 0.000622 |
| 2:1      | CTRL   | RASA2  | 8  | 8  | 3         | 0.001090 |
| 4:1      | CTRL   | RASA2  | 8  | 8  | 2         | 0.000622 |
| No Tregs | CTRL   | RASA2  | 8  | 8  | 0         | 0.000155 |

### 1.15. Fig\_ED3b

| Time | group1 | group2 | n1 | n2 | statistic  | df | p        |
|------|--------|--------|----|----|------------|----|----------|
| 0    | AAVS1  | RASA2  | 6  | 6  | -2.9124091 | 5  | 0.033300 |
| 3    | AAVS1  | RASA2  | 6  | 6  | -5.8234333 | 5  | 0.002110 |
| 10   | AAVS1  | RASA2  | 6  | 6  | -7.7061730 | 5  | 0.000587 |
| 30   | AAVS1  | RASA2  | 4  | 4  | -0.3927774 | 3  | 0.721000 |
| 60   | AAVS1  | RASA2  | 5  | 5  | -1.1401137 | 4  | 0.318000 |

### 1.16. Fig\_ED4f

| T:E    | Nalm6   | group1 | group2 | n1 | n2 | statistic | df       | p        |
|--------|---------|--------|--------|----|----|-----------|----------|----------|
| 1:0.25 | V. .low | CTRL   | RASA2  | 4  | 4  | -5.526086 | 4.811813 | 3.00e-03 |
| 1:0.25 | Low     | CTRL   | RASA2  | 6  | 6  | -6.903946 | 9.347904 | 5.84e-05 |
| 1:0.25 | WT      | CTRL   | RASA2  | 6  | 6  | -6.826840 | 9.982166 | 4.63e-05 |
| 1:0.5  | V. .low | CTRL   | RASA2  | 4  | 4  | -9.340107 | 3.697574 | 1.06e-03 |
| 1:0.5  | Low     | CTRL   | RASA2  | 6  | 6  | -6.591883 | 9.442494 | 8.03e-05 |
| 1:0.5  | WT      | CTRL   | RASA2  | 6  | 6  | -2.619695 | 7.452163 | 3.26e-02 |
| 1:1    | V. .low | CTRL   | RASA2  | 4  | 4  | -11.87094 | 4.622244 | 1.23e-04 |
| 1:1    | Low     | CTRL   | RASA2  | 6  | 6  | -4.080421 | 9.631713 | 2.39e-03 |
| 1:1    | WT      | CTRL   | RASA2  | 6  | 6  | -3.547832 | 5.971405 | 1.22e-02 |
| 1:2    | V. .low | CTRL   | RASA2  | 4  | 4  | -8.447693 | 5.434358 | 2.52e-04 |
| 1:2    | Low     | CTRL   | RASA2  | 6  | 6  | -7.020443 | 7.752312 | 1.28e-04 |
| 1:2    | WT      | CTRL   | RASA2  | 6  | 6  | -2.057215 | 9.944595 | 6.69e-02 |

**1.17. Fig\_ED6i**

| pop  | group1 | group2 | n1 | n2 | statistic | p      |
|------|--------|--------|----|----|-----------|--------|
| CD39 | AAVS   | RASA2  | 8  | 8  | 32        | 1.0000 |
| LAG3 | AAVS   | RASA2  | 8  | 8  | 25        | 0.5050 |
| PD1  | AAVS   | RASA2  | 8  | 8  | 12        | 0.0379 |
| TIM3 | AAVS   | RASA2  | 8  | 8  | 37        | 0.6450 |

**1.18. Fig\_ED7b**

| Type | Group | group1 | group2 | n1 | n2 | statistic | p        |
|------|-------|--------|--------|----|----|-----------|----------|
| MITO | CAR   | CTRL   | RASA2  | 4  | 4  | 0         | 2.86e-02 |
| ROS  | CAR   | CTRL   | RASA2  | 4  | 4  | 0         | 2.86e-02 |
| MITO | TCR   | CTRL   | RASA2  | 10 | 10 | 0         | 1.08e-05 |
| ROS  | TCR   | CTRL   | RASA2  | 10 | 10 | 20        | 2.32e-02 |

**1.19. Fig\_ED7d**

| Stim    | name        | group1 | group2 | n1 | n2 | statistic | p       |
|---------|-------------|--------|--------|----|----|-----------|---------|
| repstim | BasalResp   | CTRL   | RASA2  | 6  | 6  | 0         | 0.00216 |
| unstim  | BasalResp   | CTRL   | RASA2  | 6  | 6  | 0         | 0.00216 |
| repstim | MaximalResp | CTRL   | RASA2  | 6  | 6  | 0         | 0.00216 |
| unstim  | MaximalResp | CTRL   | RASA2  | 6  | 6  | 0         | 0.00216 |
| repstim | SpareResp   | CTRL   | RASA2  | 6  | 6  | 0         | 0.00216 |
| unstim  | SpareResp   | CTRL   | RASA2  | 6  | 6  | 5         | 0.04110 |

**1.20. Fig\_ED7e**

| Stim    | name         | group1 | group2 | n1 | n2 | statistic | p       |
|---------|--------------|--------|--------|----|----|-----------|---------|
| repstim | ECAR_Basal   | CTRL   | RASA2  | 6  | 6  | 0         | 0.00216 |
| unstim  | ECAR_Basal   | CTRL   | RASA2  | 6  | 6  | 0         | 0.00216 |
| repstim | ECAR_Maximal | CTRL   | RASA2  | 6  | 6  | 0         | 0.00216 |
| unstim  | ECAR_Maximal | CTRL   | RASA2  | 6  | 6  | 18        | 1.00000 |
| repstim | ECAR_Spare   | CTRL   | RASA2  | 6  | 6  | 0         | 0.00216 |
| unstim  | ECAR_Spare   | CTRL   | RASA2  | 6  | 6  | 36        | 0.00216 |

**1.21. Fig\_ED7f**

| Target | Stim    | name        | DFn | DFd | F      | p        | ges   |
|--------|---------|-------------|-----|-----|--------|----------|-------|
| CTRL   | repstim | BasalResp   | 3   | 19  | 1.718  | 1.97e-01 | 0.213 |
| CTRL   | repstim | MaximalResp | 3   | 19  | 21.356 | 2.64e-06 | 0.771 |
| CTRL   | repstim | SpareResp   | 3   | 19  | 23.164 | 1.46e-06 | 0.785 |
| RASA2  | repstim | BasalResp   | 3   | 19  | 1.664  | 2.08e-01 | 0.208 |
| RASA2  | repstim | MaximalResp | 3   | 19  | 0.592  | 6.28e-01 | 0.085 |
| RASA2  | repstim | SpareResp   | 3   | 19  | 1.327  | 2.95e-01 | 0.173 |
| CTRL   | unstim  | BasalResp   | 3   | 19  | 2.933  | 6.00e-02 | 0.317 |
| CTRL   | unstim  | MaximalResp | 3   | 19  | 0.656  | 5.89e-01 | 0.094 |
| CTRL   | unstim  | SpareResp   | 3   | 19  | 1.575  | 2.28e-01 | 0.199 |
| RASA2  | unstim  | BasalResp   | 3   | 19  | 5.332  | 8.00e-03 | 0.457 |
| RASA2  | unstim  | MaximalResp | 3   | 19  | 1.418  | 2.69e-01 | 0.183 |
| RASA2  | unstim  | SpareResp   | 3   | 19  | 2.511  | 9.00e-02 | 0.284 |

### 1.22. Fig\_ED9j

Gating strategy is as in Fig 4i and:

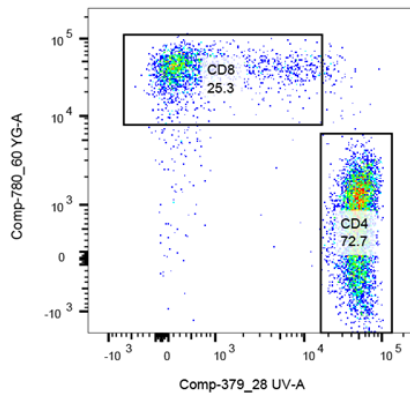

| Pop  | Day    | group1 | group2 | n1 | n2 | statistic | p        |
|------|--------|--------|--------|----|----|-----------|----------|
| CD4+ | Day 16 | AAVS1  | RASA2  | 5  | 6  | 19        | 0.537000 |
| CD4+ | Day 7  | AAVS1  | RASA2  | 10 | 12 | 0         | 0.000083 |
| CD8+ | Day 16 | AAVS1  | RASA2  | 5  | 6  | 8         | 0.247000 |
| CD8+ | Day 7  | AAVS1  | RASA2  | 10 | 12 | 116       | 0.000242 |

### 1.23. Fig\_ED9k

Gating strategy is as in Fig ED9j and:

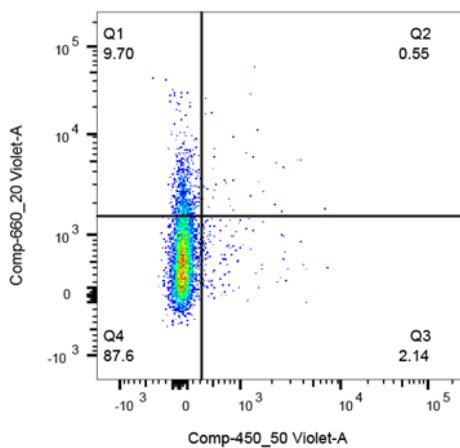

| Subset | Day | Pop3          | group1 | group2 | n1 | n2 | stat | p       |
|--------|-----|---------------|--------|--------|----|----|------|---------|
| CD4    | 16  | CD62L+CD45RA+ | CTRL   | RASA2  | 6  | 6  | 29   | 0.09310 |
| CD4    | 16  | CD62L+CD45RA- | CTRL   | RASA2  | 5  | 6  | 29   | 0.01350 |
| CD4    | 16  | CD62L-CD45RA- | CTRL   | RASA2  | 6  | 6  | 9    | 0.17300 |
| CD4    | 16  | CD62L-CD45RA+ | CTRL   | RASA2  | 6  | 6  | 16   | 0.81800 |
| CD8    | 16  | CD62L+CD45RA+ | CTRL   | RASA2  | 6  | 6  | 36   | 0.00216 |
| CD8    | 16  | CD62L+CD45RA- | CTRL   | RASA2  | 6  | 6  | 36   | 0.00477 |
| CD8    | 16  | CD62L-CD45RA- | CTRL   | RASA2  | 6  | 6  | 33   | 0.01520 |
| CD8    | 16  | CD62L-CD45RA+ | CTRL   | RASA2  | 6  | 6  | 1    | 0.00433 |
| CD4    | 7   | CD62L+CD45RA+ | CTRL   | RASA2  | 5  | 6  | 18   | 0.66200 |
| CD4    | 7   | CD62L+CD45RA- | CTRL   | RASA2  | 5  | 6  | 25   | 0.08230 |
| CD4    | 7   | CD62L-CD45RA- | CTRL   | RASA2  | 5  | 6  | 22   | 0.24700 |
| CD4    | 7   | CD62L-CD45RA+ | CTRL   | RASA2  | 5  | 6  | 20   | 0.42900 |
| CD8    | 7   | CD62L+CD45RA+ | CTRL   | RASA2  | 5  | 6  | 23   | 0.17700 |
| CD8    | 7   | CD62L+CD45RA- | CTRL   | RASA2  | 5  | 6  | 27   | 0.03030 |

| Subset | Day | Pop3          | group1 | group2 | n1 | n2 | stat | p       |
|--------|-----|---------------|--------|--------|----|----|------|---------|
| CD8    | 7   | CD62L-CD45RA- | CTRL   | RASA2  | 5  | 6  | 8    | 0.24700 |
| CD8    | 7   | CD62L-CD45RA+ | CTRL   | RASA2  | 5  | 6  | 13   | 0.79200 |



## Statistics and Reproducibility - experimental design and details

### Figure 1

- b) n=4 human donors for the Stimulation only and Tregs screen, n=2 for the Adenosine, Cyclosporine and Tacrolimus screens, and n=1 for the TGF $\beta$  screen. Statistics for each screen were derived using MAGeCK software which utilized robust rank aggregation for gene level analyses. Data for this analysis can be found in Supplementary Table 1.
- e-f) n=2 human T cell donors in triplicates. This experiment was performed twice with similar results.
- g) This experiment was performed once in n=4 independent human T donors.
- h) Data shown for one representative donor out of four independent T cell donors with similar results.

### Figure 2

- b) Experiment performed twice with similar results.
- c-f) n=2 human T cell donors in triplicates. Experiments were performed at least twice with similar results.
- g) n=2 human T cell donors in duplicate. Experiments were performed once.
- h) Data shown for one representative donor out of two independent T cell donors. Experiment was performed once.
- i) Experiment was performed once.
- j-k) n=4 human T cell donors, experiment was performed once.

### Figure 3

- b) This experiment was performed once in n=4 independent human T donors.
- c,d) This experiment was performed once in n=3 independent human T donors with the NY-ESO-1 TCR, and once in n=3 independent human T donors with the CD19-specific CAR.
- e) Data representative of one T cell donor, was repeated in at least 8 T cell donors across 4 independent experiments with similar results.
- f) n=2 human T cell donors in triplicate. This experiment was repeated three times with similar results.
- g) This experiment was performed once in n=3 independent human T donors.
- h-i) This experiment was performed with n=2 human T cell donors in 6 technical replicates. This experiment was performed twice with similar results.
- j-l) Data in (j) is for one donor and for (k) is for two donors, and (l) is data from 7 different human T cell donors aggregated from three independent experiments.
- m) Data in is for one representative donor in triplicates. This experiment was performed in 3 different T cell donors (summary statistics available in Extended data 8c). This experiment was repeated twice with similar results.

### Figure 4

- b) n=6 biologically independent mice per group. This experiment was performed once.
- d) n=5 mice with RASA2 KO T cells, n=4 for CTRL T cells. This experiment was performed once.
- f,g) n=7 mice per group. This experiment was performed twice with two separate donors with similar results.
- i-j) Day 7: n=5 for CTRL, n=6 for RASA2, Day 16: n=6 for CTRL, n=6 for RASA2. This experiment was performed once.

k) Day 7: n=6 for “mix 1” (triangles), n=6 for “mix 2” (circles), Day 16: n=6 for “mix 1”, n=6 for “mix 2”. This experiment was performed once.

m-o) Quantitative bioluminescence imaging (mean  $\pm$  SEM, n=10 for CTRL, n=14 for RASA2, \*p < 0.05 for two-tailed paired Student’s t-test). n, Representative bioluminescence images of each treatment group. (o) Survival curve for the LM7 cohort in (m) (n=10 for CTRL; n=14 for RASA2 group; exact p-value by log-rank test). This experiment was performed twice with two separate donors with similar results.

#### Extended Data Figure 1

a-e) n=4 human donors for the Stimulation only and Tregs screen, n=2 for Adenosine, Cyclosporine and Tacrolimus screens, and n=1 for the TGF $\beta$  screen. Statistics for each screen were derived using MAGeCK software which utilized robust rank aggregation for gene level analyses. Data for this analysis can be found in Supplementary Table 1.

f) n=2 human T cell donors, 2 sgRNAs per gene target in triplicates. This experiment was performed once.

#### Extended Data Figure 2

a) n=4 human T cell donors. This experiment was performed at least 5 times with similar results.

b) n=2 human T cell donors. This experiment was performed three times with similar results.

c) Data from one representative donor out of 2 human T cell donors tested in triplicate. This experiment was performed twice with similar results.

d) n=2 donors in 3 replicates. This experiment was performed twice with similar results.

e) Data from one representative donor with 3 technical replicates. This experiment was performed in 2 human T cell donors twice with similar results.

f,h) This experiment was performed once in n=4 independent human T donors. Data from all four donors is shown.

#### Extended Data Figure 3

a) Experiment performed once.

b,c) Data for 3 different human T cell donors. This experiment was performed twice with similar results.

d,e) n = 2 human T cell donors. This experiment was performed twice with similar results.

f) n = 2 human T cell donors. This experiment was performed twice with similar results.

g) Representative data for one of 4 human T cell donors for p-ERK and CFSE, then data shown for all 4 human T cell donors for CD69. n = 4 human T cell donors. This experiment was performed twice with similar results.

#### Extended Data Figure 4

a) Representative data for one of two donors. This experiment was repeated 3 times with similar results.

b) Left: n = 2 human T cell donors. This experiment was repeated three times with similar results. Middle: n = 2 human T cell donors, experiment was performed twice with similar results. Right: n = 2 human T cell donors, experiment was performed twice with similar results.

d) n = 2 human T cell donors. This experiment was repeated at least 5 times with similar results.

e,f) n = 2 human T cell donors. Experiment was performed once.

#### Extended Data Figure 5

- a) Experiment was performed once.
- b-d) n = 4 human T cell donors. This experiment was performed once.
- k) n= 2 human T cell donors. This experiment was performed twice with similar results.
- l) n= 3 human T cell donors. This experiment was performed in the 3 T cell donors across three independent experiments.
- m) representative data from one human T cell donor out of two, which are shown in (n).
- n) n=2 human T cell donors. This experiment was performed twice with similar results.

#### Extended Data Figure 6

- a) n=4 T cell donors, this experiment was performed once.
- b) n=3 T cell donors, this experiment was performed once.
- c) n=4 T cell donors, this experiment was performed at least twice with similar results.
- d,e) Representative data from two T cell donors. n=2 T cell donors in (e). This experiment was performed at least three times with similar results.
- f) Experiment was performed once.
- g) Data from one representative donor out of two. This experiment was performed at least three times with similar results.
- h) n = 2 human T cell donors. This experiment was performed at least three times with similar results.
- i) n = 4 human T cell donors. This experiment was performed at least three times with similar results.

#### Extended Data Figure 7

- a) n=3 human T cell donors. Experiment was performed once.
- b) n=2 human T cell donors. Experiment was performed twice with similar results.
- c-e) Data shown for one of two T cell donors. Experiment was performed twice with similar results.
- f) Experiment performed once.

#### Extended Data Figure 8

- a) Representative data for one human donor out of 7 different human T cell donors from three independent experiments (summarized in Figure 3l).
- b) Experiment repeated at least three times with similar results.
- c) n=3 human T cell donors. This experiment was repeated twice with similar results.
- d) Representative data from one of the donors described in (c).
- e) Representative data for one of two human T cell donors co-cultured with Nalm6 leukemia cells. Experiment was performed twice with similar results.
- f) Representative data for one of two human T cell donors summarized in (g).
- g) n=2 human T cell donors. This experiment was performed once.

#### Extended Data Figure 9

- a,b) n=6 biologically independent mice per group. This experiment was performed once.
- c,d) n=5 mice with RASA2 KO T cells, n=4 for CTRL T cells. This experiment was performed once.
- e) Representative data from two human T cell donors. This experiment was performed twice with similar results.

f,g) n=7 mice per group. This experiment was performed twice with two separate donors with similar results.

h,i) n=8 mice per group for control-edited CAR-T cells and n=7 mice per group for RASA2 edited CAR-T cells. This experiment was performed twice with two separate donors with similar results.

j,k) Day 7: n=5 for CTRL, n=6 for RASA2, Day 16: n=6 for CTRL, n=6 for RASA2, error bars mean  $\pm$  SEM. This experiment was performed once.

l) representative gating data for (m).

m) Day 7: n=6 for CTRL, n=6 for RASA2, Day 16: n=6 for CTRL, n=6 for RASA2. This experiment was performed once.

#### Extended Data Figure 10

a-c) n=5 in no T cell control arm, and n=7 mice per arm in each cohort. This experiment was performed once. Survival analysis for the leukemia rechallenge model of the cohort shown in (a,b). Exact p-value by log-rank test.

d) n=2 human donors, n=3 mice per group. This experiment was performed once.

e,f) For mice receiving only CAR-T cells (n=2 human donors, n=3 mice per group), as well as mice receiving tumor-clearing CAR-T cell infusions (n=1 human donor, n=6 mice per group). This experiment was performed once. (f) shows representative H&Es from bone marrow and spleens of mice from (e).

h) n=10 for CTRL, n=14 for RASA2. This experiment was performed twice with two separate donors with similar results.

i) n=2 human T cell donors. This experiment was performed 5 times with similar results.

j) n=10 for CTRL, n=14 for RASA2. Experiment was performed twice with similar results.

k) Mice without detectable BLI from experiment in (j), which include n=1 no T cell control, n=1 CTRL, and n=3 RASA2 KO CAR-T cell condition, were re-challenged with a second tumor injection. This experiment was performed twice with similar results.
